# Supplementary material for: Interleukin-27-polarized HIV-resistant M2 macrophages are a novel subtype of macrophages that express distinct antiviral gene profiles in individual cells: implication for the antiviral effect via different mechanisms in the individual cell-dependent manner
Source: Front Immunol. 2025 Mar 10;16:1550699. doi: 10.3389/fimmu.2025.1550699 (PMC11931227; doi:10.3389/fimmu.2025.1550699)
Supplement: Supplementary file 2 [file Table2.xlsx]

## Sheet: Sheet1
S.Table 2. Population of each cells in the cluster of Donor 1 and Donor 2
A											B
	Cluster #											Percentage of majority cells in each cluster #
Donor 1	1	2	3	4	5	6	7	8	9			1	2	3	4	5	6	7	8	9
M2 (4856 cells)	0	2 (0.041%)	2 (0.041%)	1 (0.021%)	2413 (49.69%)	2287 (47.1%)	11 (0.23%)	10 (0.21%)	130 (2.68%)		M2 (4856 cells)					0.999586	0.999126			0.183099
27-Mac (5572 cells)	5340 (95.84%)	14 (0.25%)	2 (0.036%)	3 (0.054%)	1 (0.018%)	0	17 (0.31%)	21 (0.38%)	174 (3.12%)		27-Mac (5572 cells)	0.998504								0.24507
6-M2d (7878 cells)	2 (0.025%)	4 (0.051%)	3804 (48.29%)	1218 (15.46%)	0	1 (0.013%)	2086 (26.48%)	664 (8.43%)	99 (1.26%)		6-M2d (7878 cells)			0.981677	0.393157			0.96129	0.84586	0.139437
BAY-M2d (6394 cells)	6 (0.094%)	3991 (62.42%)	67 (1.05%)	1876 (29.34%)	0	1 (0.016%)	56 (0.88%)	90 (1.41%)	307 (4.8%)		BAY-M2d (6394 cells)		0.995014		0.605552					0.432394
Total (24700 cells)	5348 (21.65%)	4011 (16.24%)	3875 (15.69%)	3098 (12.54%)	2414 (9.77%)	2289 (9.27%)	2170 (8.79%)	785 (3.18%)	710 (2.87%)
C											D
	Cluster #											Percentage of majority cells in each cluster #
Donor 2	1	2	3	4	5	6	7					1	2	3	4	5	6	7
M2 (4205 cells)	1615 (38.41%)	1228 (29.2%)	1316 (31.3%)	0	2 (0.048%)	7 (0.17%)	37 (0.88%)				M2 (4856 cells)	0.383702	0.336346	0.410737				0.406593
27-Mac (5530 cells)	8 (0.14%)	3 (0.054%)	20 (0.36%)	3071 (55.53%)	2427 (43.89%)	0	1 (0.018%)				27-Mac (5572 cells)				0.999349	0.789782		0.010989
6-M2d (3905 cells)	411 (10.52%)	1121 (28.71%)	554 (14.19%)	0	0	1798 (46.04%)	21 (0.54%)				6-M2d (7878 cells)		0.307039	0.410112			0.995019	0.230769
BAY-M2d (4832 cells)	2175 (45.01%)	1299 (26.88%)	1314 (27.19%)	2 (0.041%)	8 (0.17%)	2 (0.041%)	32 (0.66%)				BAY-M2d (6394 cells)	0.51675	0.355793					0.351648
Total (18472 cells)	4209 (22.79%)	3651 (19.77%)	3204 (17.35%)	3073 (16.64%)	2437 (13.19%)	1807 (9.78%)	91 (0.49%)
